# Supplementary material
Source: HighWire-hosted journal article supplement (https://gut.bmj.com/content/69/3/513)
Supplement: inline-supplementary-material-1 [file inline-supplementary-material-1.pdf]

## Supplementary materials for

### Gut dysbiosis induces the development of preeclampsia through bacterial translocation

Xia Chen<sup>1, #</sup>, Pan Li<sup>2, #</sup>, Mian Liu<sup>1, #</sup>, Huimin Zheng<sup>2, 3</sup>, Yan He<sup>2</sup>, Muxuan Chen<sup>2</sup>, Wenli Tang<sup>2</sup>, Xiaojing Yue<sup>1</sup>, Yongxin Huang<sup>1</sup>, Lingling Zhuang<sup>4</sup>, Zhijian Wang<sup>1</sup>, Mei Zhong<sup>1</sup>, Guibao Ke<sup>5</sup>, Haoyue Hu<sup>1</sup>, Yinglin Feng<sup>1</sup>, Yun Chen<sup>1</sup>, Yanhong Yu<sup>1</sup>, Hongwei Zhou<sup>2</sup>, and Liping Huang<sup>1</sup>

1. Department of Obstetrics and Gynecology, Nanfang Hospital, Southern Medical University, Guangzhou, China

2. Microbiome Medicine Center, Division of Laboratory Medicine, Zhujiang Hospital, Southern Medical University, Guangzhou, China.

3. Microbiome Research Centre, St George and Sutherland Clinical School, University of New South Wales, Sydney, Australia.

4. Department of Gynecology and Obstetrics, The First Affiliated Hospital of Nanchang University, Nanchang, China

5. Department of Nephrology, Affiliated Hospital of Chengdu University, Chengdu, China.

# Contributed equally.

Correspondence to: Professor Liping Huang, Department of Obstetrics and Gynecology, Nanfang Hospital, Southern Medical University, Guangzhou 510515, China; Tel: +86(20)61641909; Email: lphuang2006@126.com, Professor Hongwei Zhou, Microbiome Medicine Center, Division of Laboratory Medicine, Zhujiang Hospital,

23 Southern Medical University, Guangzhou 510515, China; Tel: +8618688489622;  
24 Email: hzhou@smu.edu.cn and Professor YanHong Yu, Department of Obstetrics and  
25 Gynecology, Nanfang Hospital, Southern Medical University, Guangzhou 510515,  
26 China; Tel: +8613503080093; Email: yuyh1010@hotmail.com.

27 **This file includes:**

28 **Supplementary materials and methods**

29 **Supplementary figures S1-S10**

30 **Supplementary tables S1-S6**

31 **Supplementary materials and methods**

32 **Human sample collection**

33 Ethical approval was granted by the Ethics Committee of Nanfang Hospital (NFEC-  
34 2017-055). Fecal samples were collected from all enrolled subjects at the hospital and  
35 stored at  $-80^{\circ}\text{C}$  before further processing. The exclusion criteria of the fecal sampling  
36 were as follows: (1) administration of any antibiotic or probiotic treatment one month  
37 before sample collection; (2) diseases that may affect microbiome composition such as  
38 thyroid disorders, asthma, lipid metabolic disorders, inflammatory bowel disease,  
39 irritable bowel syndrome, and celiac disease; (3) chronic hypertension, chronic kidney  
40 disease, or other obstetric conditions complicating pregnancy.

41 Placental samples were randomly obtained from 22 NP and 24 PE patients with severe  
42 features during caesarean section in an operating room to ensure sterility. Briefly,  
43 following standard obstetrical practice, six  $1\text{-cm}^3$  cuboidal sections were immediately

44 obtained from each placenta: three from the maternal side of the placenta and three from  
45 the fetal side. The personnel wore facial masks and sterile gloves and used a sterile  
46 scalpel and other instruments. Each sample was rinsed in sterile phosphate-buffered  
47 saline (PBS), placed in a sterile cryovial, flash-frozen in liquid nitrogen, and stored at  
48  $-80^{\circ}\text{C}$ . One maternal-side biopsy sample and one fetal-side sample were selected  
49 randomly for mRNA and DNA isolation, respectively. We also collected several types  
50 of negative controls as follows: (1) sterile wet swabs that were opened in the sample  
51 sampling room, waved in the air and subjected to the same treatment as the placental  
52 samples, such as washing with sterile PBS, freezing in cryovials, and storage or  
53 transportation of the samples (“Swab”); (2) DNA-free water that was processed with  
54 the DNA extraction (“ $\text{H}_2\text{O}$ ”); (3) PCR-grade water processed in parallel to the samples  
55 during amplification and DNA sequencing acquisition (“ $\text{H}_2\text{O}$ ”). These negative  
56 controls were strictly performed side-by-side with placental samples at the same time,  
57 space, and exposure, with identical reagents, equipment, and personnel. Different  
58 sample groups were randomized and not processed separately from collection to  
59 sequencing.

#### 60 **Details of animal experimental protocol**

61 C57BL/6 mice were obtained from the experimental animal center of Southern Medical  
62 University. All experimental procedures complied with the National Institutes of Health  
63 guidelines and ethics approval was obtained from the local Animal Care and Use  
64 Committee of the Southern Medical University. Fresh fecal samples were collected  
65 from the donors, resuspended in PBS at 0.125 g/mL, and centrifuged to obtain the

66 supernatant. Following antibiotic treatment, the recipient mice were randomly divided  
67 into three groups and orally inoculated daily for 3 consecutive days and twice each  
68 week for 59 days with PBS and the prepared fecal contents mixture from PE or healthy  
69 donors. Microbial concentrations of preparations were determined by fluorescent *in situ*  
70 hybridization combined with flow cytometry, and mice were administered a dose of  
71 approximately  $3 \times 10^{10}$  cells. After overnight mating, we enrolled 10 pregnant mice in  
72 each group and other mice were excluded from the study at 45 days post-FMT. Three  
73 or four mice were housed in a standard mouse cage before pregnancy. After confirming  
74 the pregnancy, the mice were housed individually until the end of the experiment.  
75 During the experiment, two control and two PE-FMT mice delivered before the end of  
76 the experiment. The remaining mice in the control (n = 8) PE-FMT (n = 8), and NP-  
77 FMT (n = 10) groups were evaluated in subsequent experiments. The gut microbial  
78 profiles of recipient mice were analyzed by 16S RNA sequencing after 6 weeks. For BP  
79 measurements, SBP was measured via the tail cuff method using a non-invasive BP  
80 instrument (Softron Biotechnology, Beijing, China). Urine was collected by massaging  
81 the bladder for one time at 6 weeks post-FMT (prior to mating) and 17 days of gestation.  
82 Seventeen days after confirming the pregnancy, the mice were anesthetized and  
83 sacrificed. The numbers of viable and resorbed pups were counted and recorded;  
84 placentas and other tissues were harvested for further analysis.

#### 85 **Total bacterial genomic DNA extraction and sequencing.**

86 Bacterial genomic DNA was extracted using a MinkaGene Stool DNA kit and  
87 MinkaGene Tissue DNA kit (Magigene, Guangdong, China) according to the

88 manufacturer's instructions. After extraction, the 16S rDNA V4 region was amplified  
89 by quantitative real-time PCR as described previously<sup>1</sup> and sequenced for fecal samples  
90 and placental samples using a HiSeq platform (Illumina, 2×250 bp paired-end) and ISeq  
91 platform (Illumina, 2 × 150 bp paired-end), respectively. For the placenta samples,  
92 decontam (v1.4.0) and SourceTracker (v1.0.1) were performed to filter the putative  
93 contaminants. Based on the bacterial prevalence, R package decontam was employed  
94 to determine the suspected contaminated OTUs. Also, SourceTracker was employed to  
95 determine the latent contaminant percentage of each OTU based on the bacterial  
96 frequency. Then the suspected contaminated OTUs were deleted and the remained  
97 OTUs were adjusted by the *Sourcetracker* percentage. The further placental analyses  
98 were performed after the decontamination procedures. The placenta samples were  
99 handled in an isolated, low-contaminant, controlled environment where surfaces and  
100 equipment treated with ultraviolet radiation to minimize and fragment environmental  
101 contaminant DNA. Moreover, personnel wore protective clothing and equipment to  
102 cover all exposed human surfaces. All placentas and paralleled negative samples were  
103 processed separately with any biological tissue sample in the same batch to specifically  
104 avoid the introduction of contaminant DNA. The specific primers for quantitative-PCR  
105 are shown in Table S5.

## 106 **Histological procedures**

107 The implantation site (uterus and placenta), kidneys, colon, and ileum were fixed and  
108 processed. Briefly, the tissues were fixed, dehydrated, infiltrated, embedded in paraffin,  
109 and sliced into 4-μm serial sections. At each implantation site, one set of sections

110 containing a central maternal arterial channel was selected for staining. Hematoxylin  
111 and eosin (HE) staining was performed and analyzed by microscopy.  
112 Immunohistochemistry were performed using primary antibodies for ZO-1, ZO-2,  
113 occluding, and claudin-4 (Abcam, Cambridge, UK) as described previously.<sup>2</sup> Sections  
114 were examined by a qualified and blinded pathologist to evaluate the degree of  
115 pathological changes.

### 116 **Isolation of lymphocytes**

117 To prepare single-cell suspensions of small intestinal lamina propria lymphocytes  
118 (siLPLs), the intestines were gently washed to remove the fecal content and epithelial  
119 layers, and then incubated with collagenase IV to isolate lymphocytes. Lymphocytes  
120 were passed through a 40- $\mu$ m mesh, and then further enriched by Percoll density-  
121 gradient centrifugation. Splenocyte single-cell suspensions were obtained using 70- $\mu$ m  
122 strainers, followed by erythrocyte lysis and subsequent filtering through a 40- $\mu$ m mesh.

### 123 **Quantitative real-time PCR**

124 Quantitative real-time PCR was carried out on an ABI Q5 real-time PCR system with  
125 the following cycling protocol: one cycle at 95°C for 10 min, followed by 40 cycles of  
126 95°C for 15 s, and 60°C for 60 s. Relative expression was calculated using the  
127 comparative threshold cycle and expressed relative to control ( $\Delta\Delta$ CT method). The  
128 levels of 18S RNA were used for data normalization.

### 129 **Supplementary figures S1-S10**

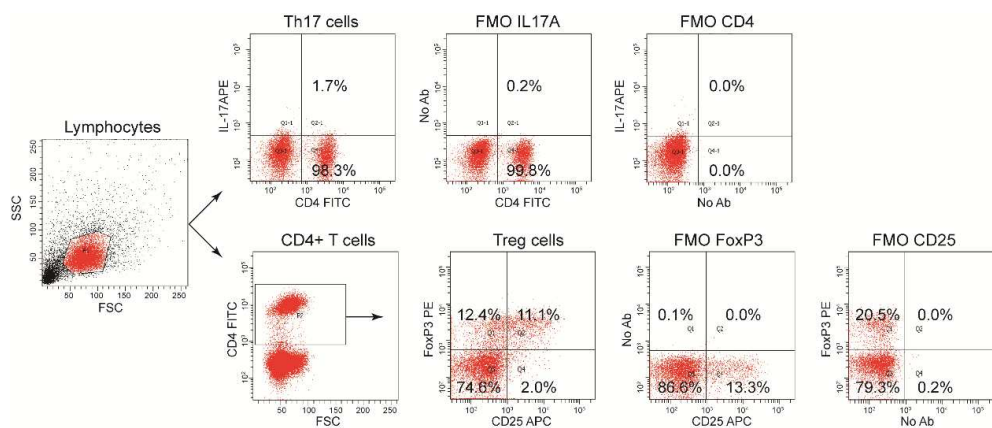

130

131 **Supplementary figure S1.** Gating strategies for regulatory T (Treg) and Helper 17 T  
132 (Th17) cells. Treg and Th17 cells were defined as the co-expression of CD4<sup>+</sup> CD25<sup>+</sup>  
133 Foxp3<sup>+</sup> and CD4<sup>+</sup> IL-17A<sup>+</sup>, respectively. Sequential gating was used to quantify the  
134 percentage of Treg and Th17 cells among CD4<sup>+</sup> T cells. Lymphocyte population was  
135 gated from single-cell suspensions according to forward scatter (FSC) characteristics  
136 and side scatter (SSC) characteristics. To identify Th17 cells, the lymphocytes were  
137 then gated on CD4 and IL-17A double-positive cells based on fluorescence minus one  
138 (FMO) controls missing IL-17A and CD4 antibodies. To detect Treg cells, the gated  
139 lymphocytes were further characterized by the expression of CD4. Afterward, the  
140 cells were gated by co-expression of CD25 and FoxP3. FMO controls for FoxP3 and  
141 CD25 were used to determine the quadrant position and fluorescence intensity for  
142 subsequent analysis.

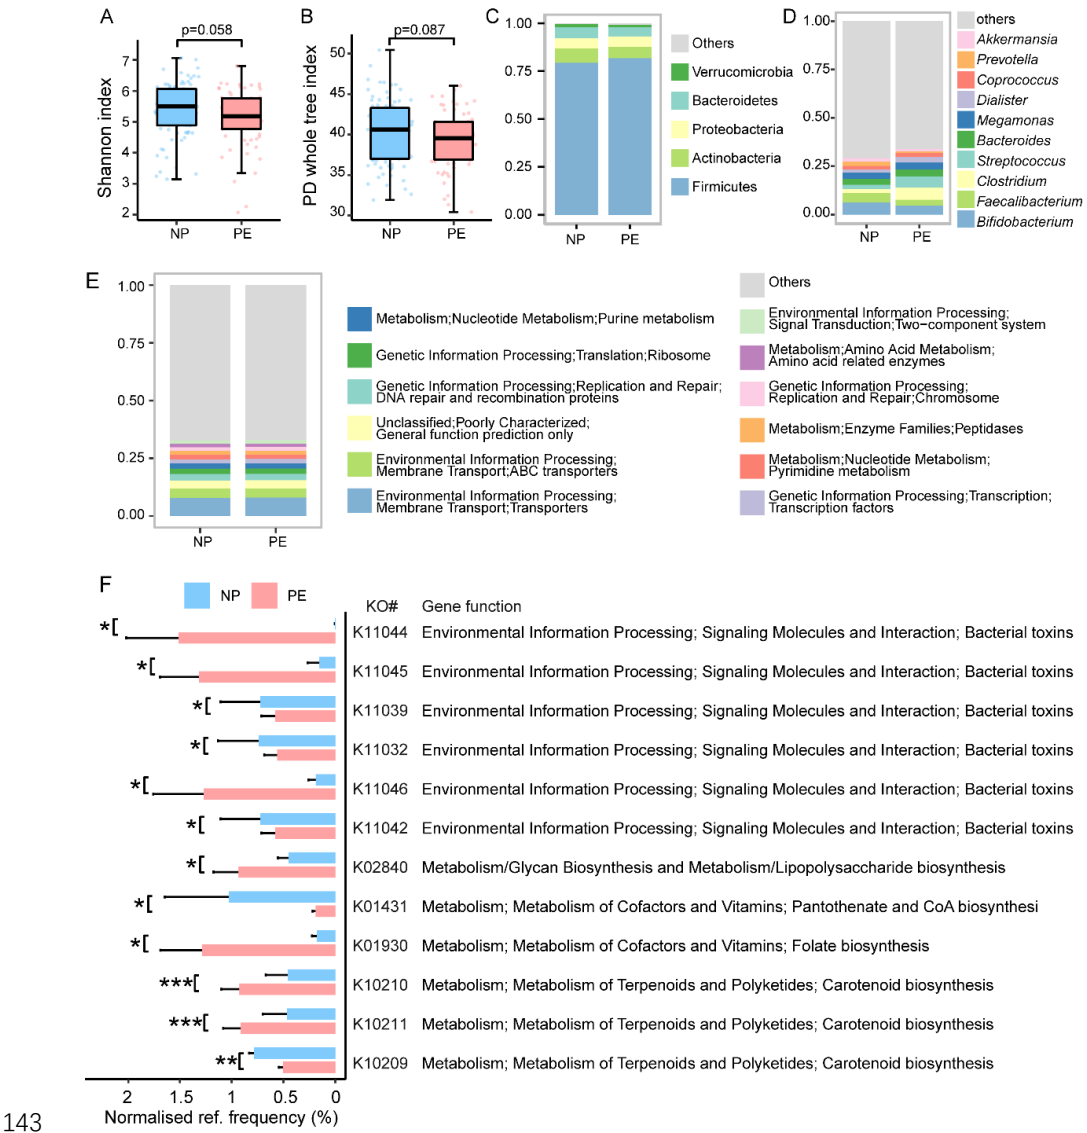

Supplementary figure S2. Differences in bacterial composition between preeclampsia (PE) and normotension (NP) groups. (A, B) Comparison of alpha-diversity indices (Shannon index and PD whole tree index) between PE and NP groups using Wilcoxon rank-sum test. (C, D) Microbial composition at the phylum level and genus level. (E) Stacked bar plot representing the predicted pathways as assessed by PICRUST. (F) Comparison of underlying disease-correlated KEGG Orthologies (KOs) between PE and NP groups. \* indicates  $p < 0.05$ , \*\* indicates  $p < 0.01$ , \*\*\* indicates  $p < 0.001$  by



151 Wilcoxon rank-sum test following the Benjamini and Hochberg method.

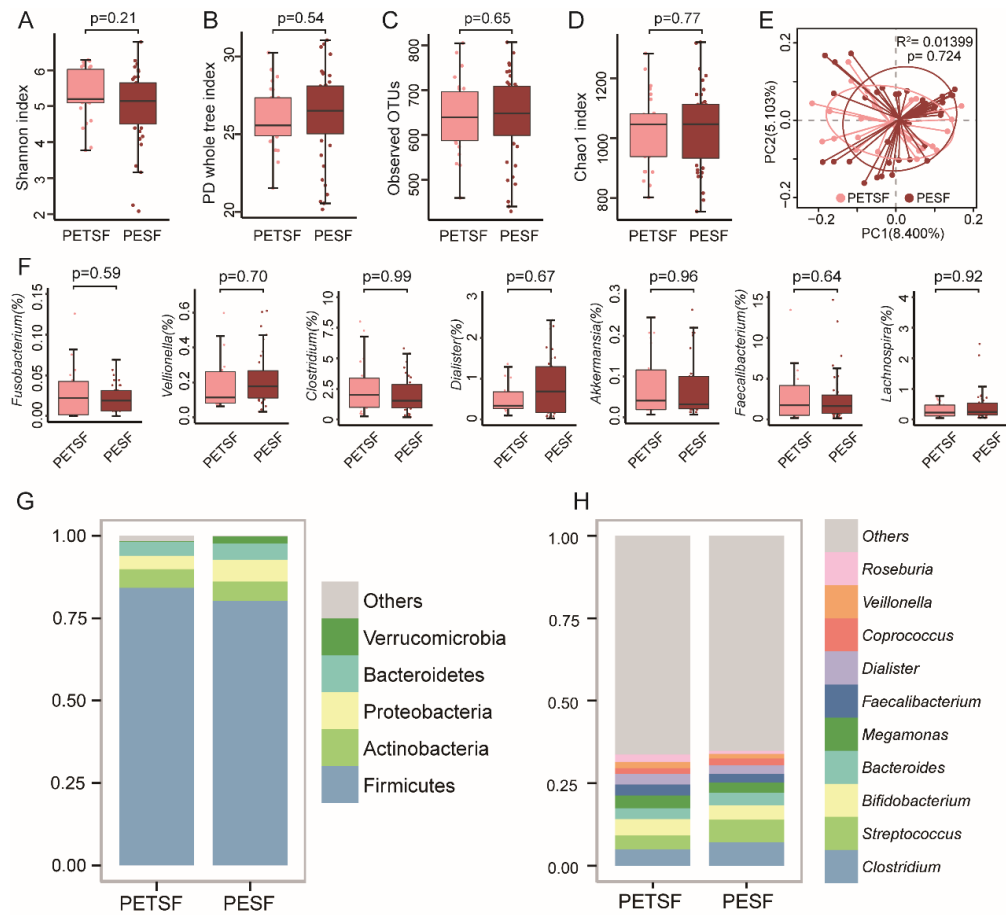

152  
153 **Supplementary figure S3.** Comparison of gut microbiota between different clinical  
154 phenotypes. (A–D) Box plot of alpha-diversity indices comparing preeclampsia without  
155 severe feature (PETSF) and preeclampsia with severe feature (PESF) groups using  
156 Wilcoxon rank-sum test. (E) Principal coordinate analysis (PCoA) based on unweighted  
157 UniFrac distances for bacterial sequences between different clinical phenotypes by  
158 PERMANOVA (Adonis). The eigenvalues of axe PC1 and PC2 were 0.74 (8.400%)  
159 and 0.43 (5.103%), respectively. (F) Relative abundances of selected genera between  
160 PETSF and PESF groups using Wilcoxon rank-sum test. (G, H) Microbial composition  
161 at the phylum level and genus level of different clinical phenotypes.

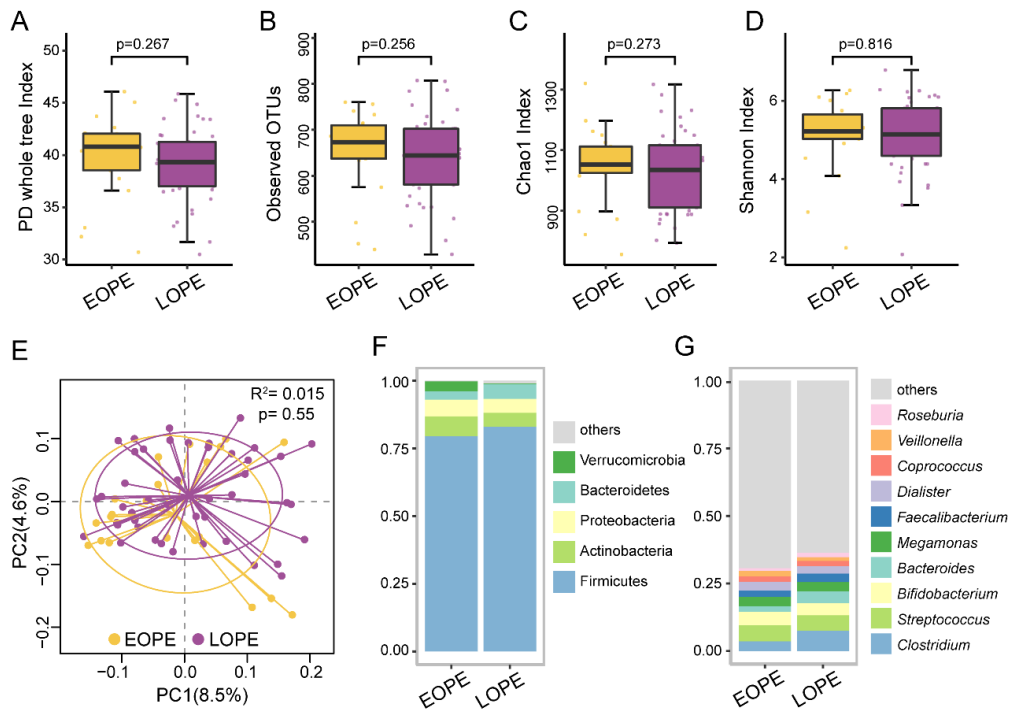

162  
163 **Supplementary figure S4.** Profile of gut microbiome composition between early-onset  
164 preeclampsia (EOPE) and late-onset preeclampsia (LOPE) groups. (A–D) Comparison  
165 of alpha-diversity indices between EOPE and LOPE using Wilcoxon rank sum test. (E)  
166 Principal coordinate analysis (PCoA) based on unweighted UniFrac distances for  
167 bacterial sequences obtained from fecal samples of EOPE and LOPE patients. The  
168 eigenvalues of axe PC1 and PC2 were 0.68 (8.5%) and 0.41 (4.6%), respectively.  
169 Difference in beta-diversity were tested by PERMANOVA (Adonis). (F, G) Average  
170 relative abundances of predominant taxa at the phylum level and genus level in the  
171 EOPE and LOPE groups.

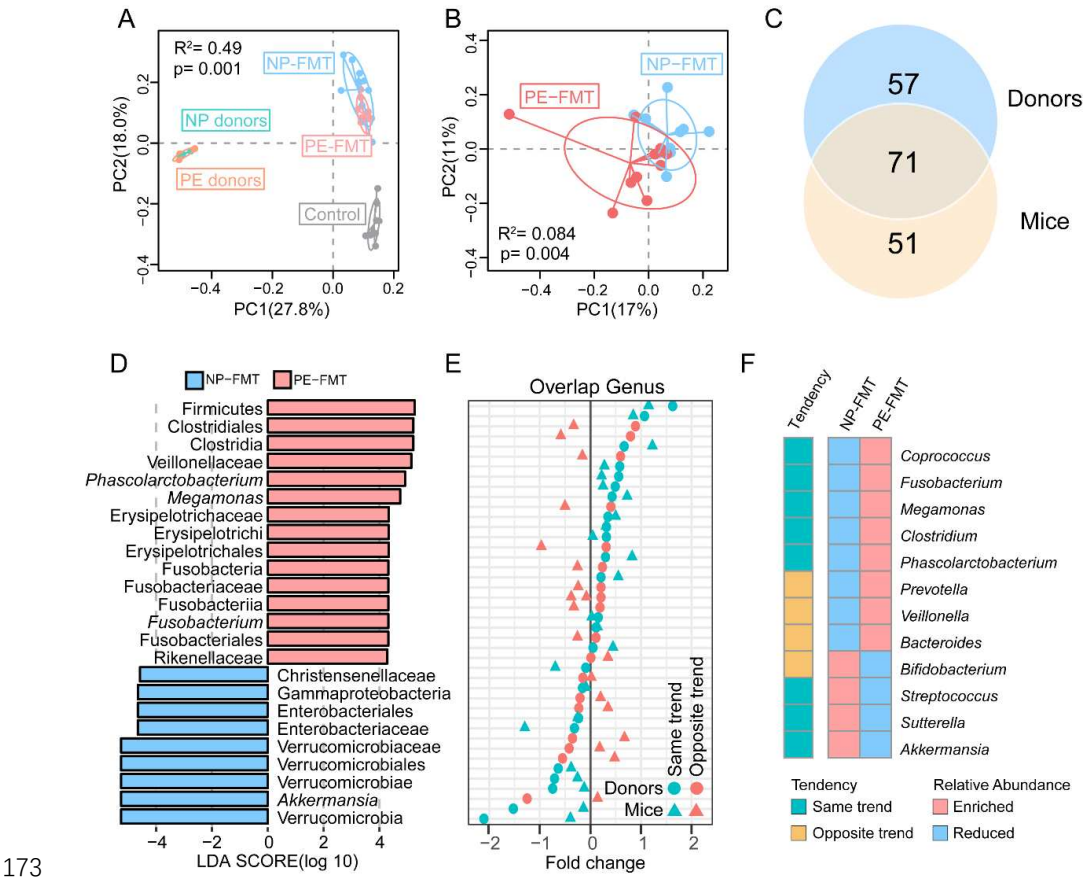

173

174 **Supplementary figure S5.** Post-transplanted intestinal microbial profiles of recipient

175 mice. (A) Principal coordinate analysis (PCoA) plots of human donors and recipient

176 mice based on unweighted UniFrac distance matrices. The eigenvalues of axe PC1 and

177 PC2 were 1.79 (27.8%) and 1.16 (18.0%), respectively. (B) PCoA plots of recipient

178 mice based on unweighted UniFrac distance matrices separate PE-FMT group from the

179 and NP-FMT group. The eigenvalues of axe PC1 and PC2 were 0.41 (17%) and 0.26

180 (11%), respectively. (C)Venn diagram comparing the shared genera number in the gut

181 microbiome of human donors and recipient mice. (D) Linear discriminant analysis

182 effect size (LEfSe) analysis identified different taxa between NP-FMT and PE FMT

183 groups. The LDA scores (log10) > 4.0 are listed. (E) Concordance of genus variations

184 between the intestinal microbiota of human donors and recipient mice. The shared  
185 genera were compared between donors and recipient mice. Circular points represent  
186 genera of human donors' microbiota, and triangle points represent recipient mice's  
187 microbiota. Blue points denote genera varying by the same trend, whereas red points  
188 denote the opposite trend. (F) Heat map comparing the abundance of altered genera  
189 between human donors and recipient mice. Red, more abundant; blue, less abundant.  
190 Genera present consistent trend with the variation in the human donors are marked with  
191 green points, while those that were inconsistent are marked with yellow points.  
192 Difference in beta-diversity were tested by PERMANOVA (Adonis) in (A, B).

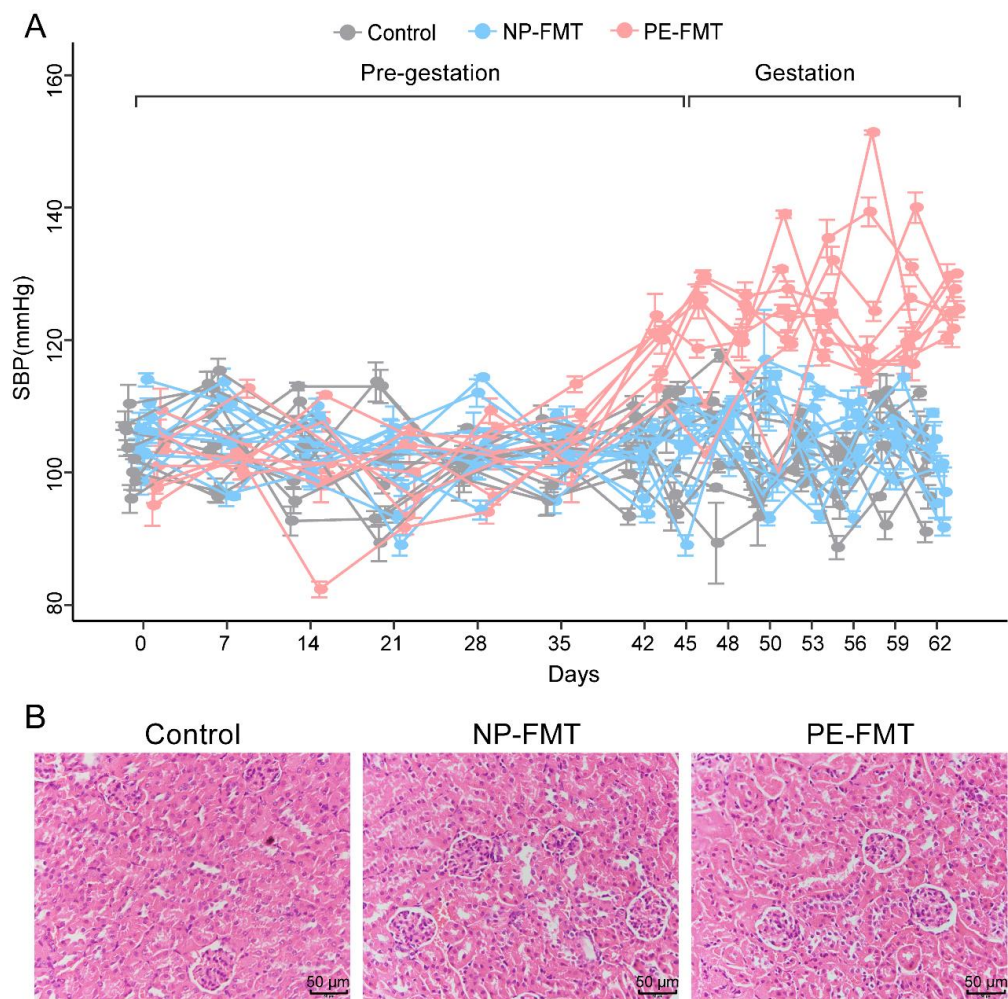

**Supplementary figure S6.** Systolic blood pressure (SBP) of each mice and kidney morphology of recipient mice. (A) SBP of all mice in the three groups. (B) Representative HE staining of the mouse kidney. Original magnification,  $\times 400$ ; scale bar = 50  $\mu$ m.

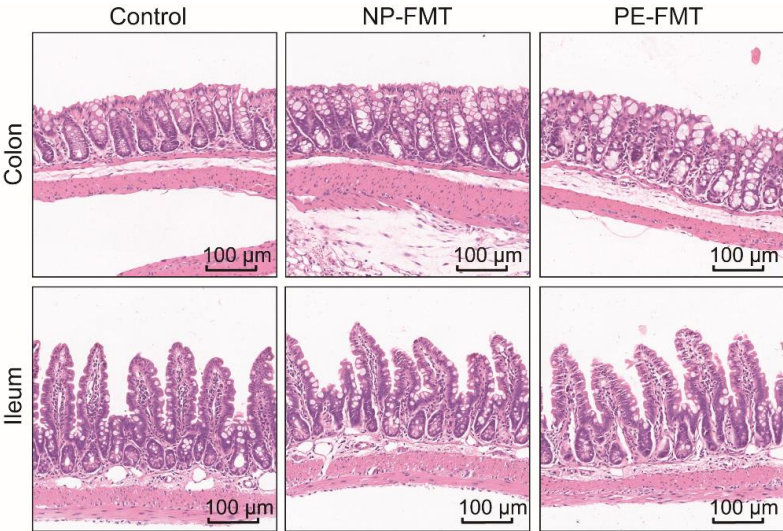

199  
200 **Supplementary figure S7.** Intestinal morphology of recipient mice. Representative HE  
201 staining of the ileum and colon tissues (original magnification, ×200; scale bar = 100  
202 μm).



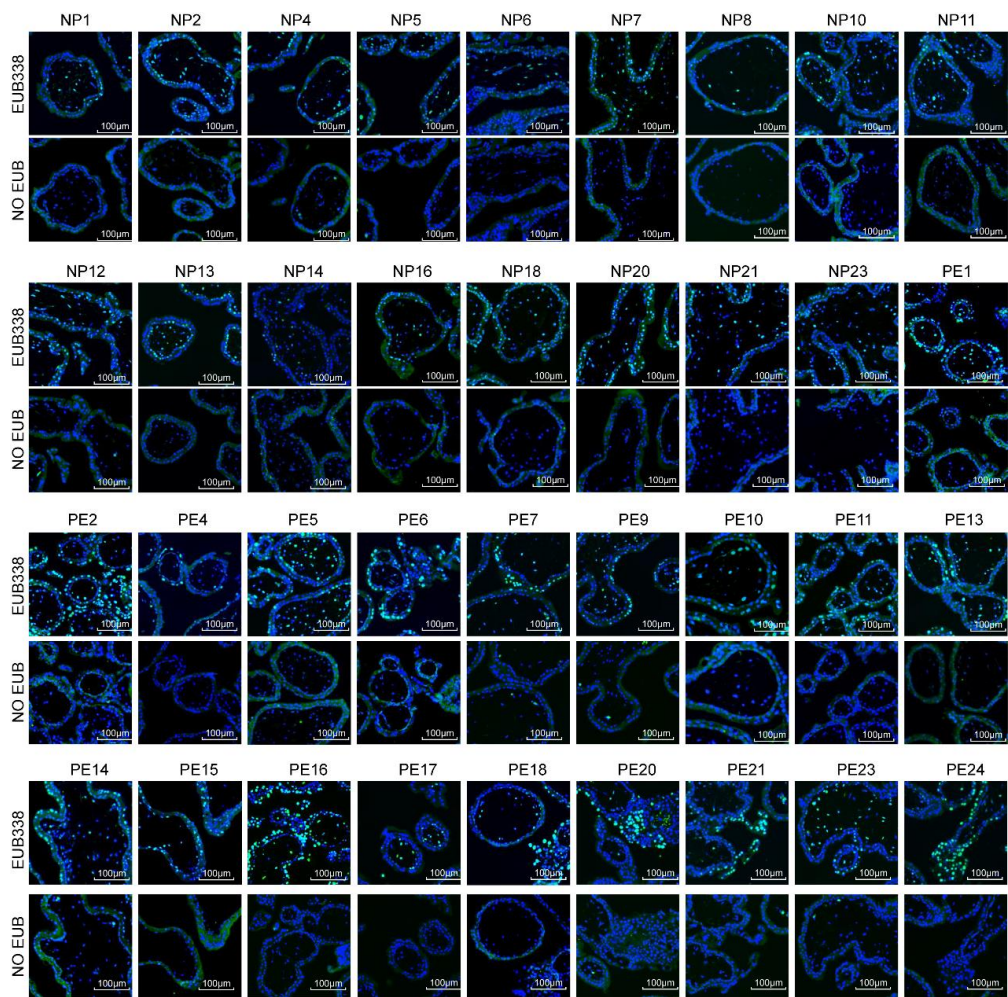

**Supplementary figure S8.** *In situ* visualized bacterial 16S rRNA signal from normotension (NP) and preeclampsia (PE) placentas. Placental tissue sections were probed with universal eubacterial probe EUB338 (green) and paired with scrambled probe NOEUB. Each image pair is of a separate placenta, with 1 for each of the 18 of 22 NP placentas and 20 of 24 PE placentas examined for which a bacterial 16S rRNA signal was observed. Original magnification,  $\times 200$ ; scale bar = 100  $\mu\text{m}$ .

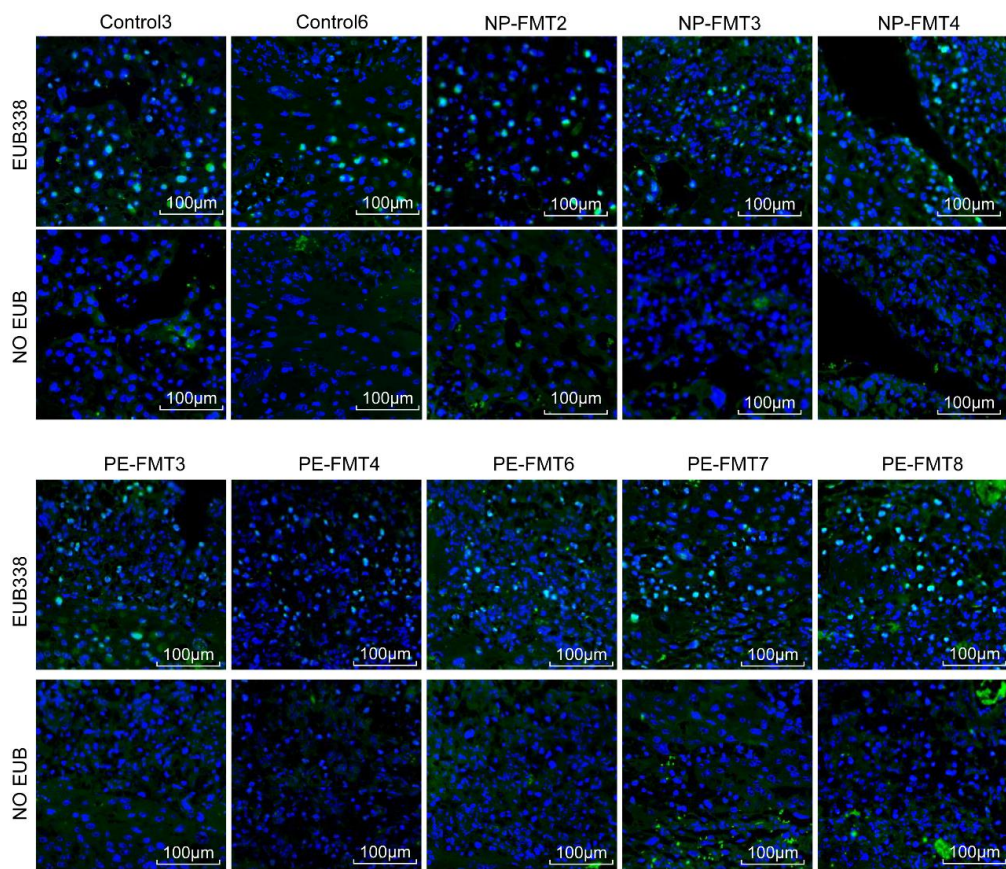

**Supplementary figure S9.** *In situ* visualized bacterial 16S rRNA signal from recipient mice. Visualized bacterial signals were observed in the junction layer of the placenta (6 of 8 in PE-FMT placentas, 4 of 8 in NP-FMT placentas, and 3 of 8 placentas of control mice). Each image pair is of a separate placenta, with 1 for each of the placentas examined where bacterial 16S rRNA signal was observed. Original magnification,  $\times 200$ ; scale bar = 100  $\mu\text{m}$ .



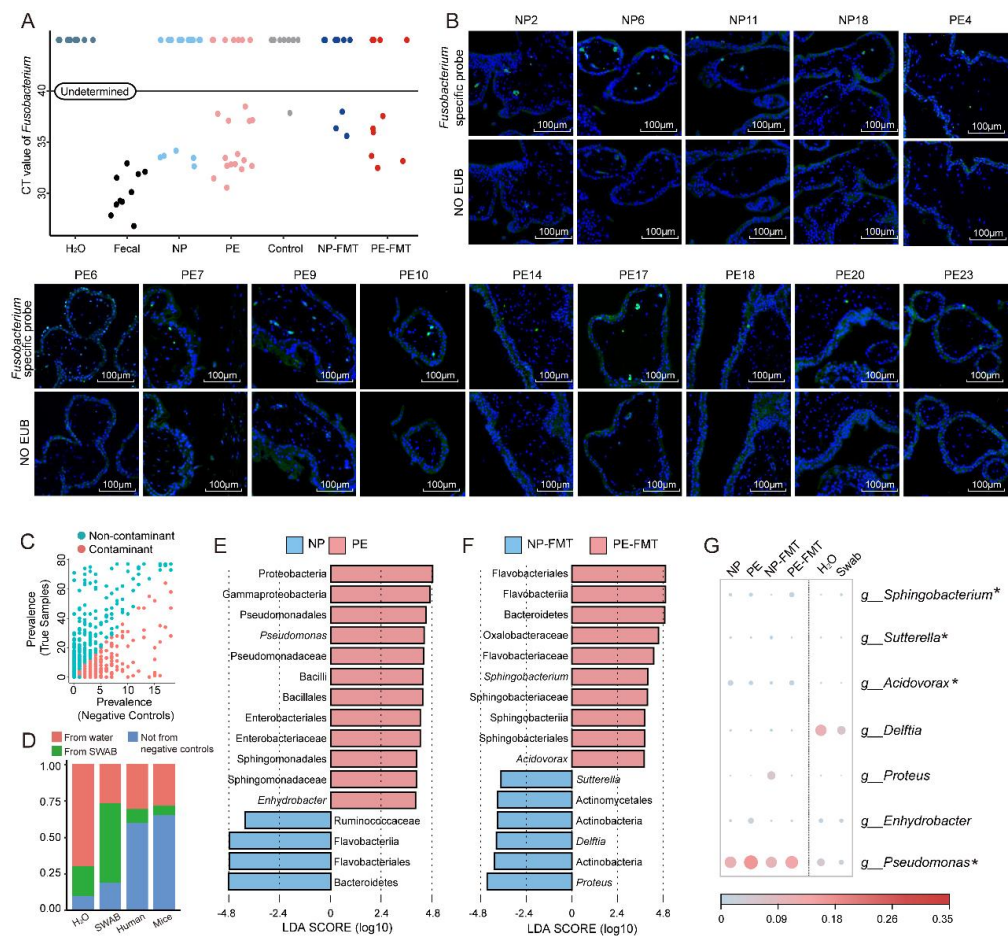

217  
218 **Supplementary figure S10.** Comparison of bacterial profile between different type of  
219 samples. (A) Quantitative-PCR analysis of the presence of genes from *Fusobacterium*  
220 in the samples studied. Values shown are the cycle of threshold (CT) of each sample.  
221 The limit of detection is a CT level of 40 (horizontal line). Samples with no detectable  
222 signal are shown above the line. (Statistical comparison between NP and PE placenta,  
223 X-squared = 4.6235,  $p < 0.05$  by Pearson's Chi-squared test; comparison between PE-  
224 FMT, NP-FMT and control placenta,  $p = 0.08$  by Fisher's exact test). (B) *In situ*  
225 visualized *Fusobacterium* 16S rRNA signal from normotension (NP) and preeclampsia  
226 (PE) placentas. Each image pair is of a separate placenta, with 1 for each of the 4 of 22  
227 NP placentas and 10 of 24 PE placentas examined where *Fusobacterium* 16S rRNA

228 signal was observed. Original magnification,  $\times 200$ ; scale bar = 100  $\mu\text{m}$ . (C) Prevalence  
229 plot of OTUs statistically determined to be noncontaminants or contaminants as  
230 determined by the decontam isContaminant and isNotContaminant function. A total of  
231 1221 OTUs were found to have statistical support indicating that they represent true  
232 OTUs. Red points denote OTUs determined to be contaminants, whereas blue points  
233 denote OTUs determined to be non-contaminants. (D) Stacked bar plot representing the  
234 source of bacteria identified in each sample using SourceTracker. The proportions of  
235 OTUs from the different sources are displayed in colors. Red and green bars represent  
236 proportions from DNA-free water during the experiment and sterile swab during  
237 placenta sampling respectively, while OTUs not from negative controls are in blue.  
238 SourceTracker uses a Bayesian approach to predict the proportion of each sequence or  
239 OTU in each sample arising from source environments. (E, F) LEfSe identifies the  
240 different taxa between normotension and PE placenta, and NP-FMT and PE-FMT  
241 placenta. (G) The abundance of genus identified by LEfSe shown for the placenta  
242 sample groups and negative control groups. The asterisk indicates a significantly  
243 enriched relative abundance of bacteria in the placenta samples. Wilcoxon rank sum  
244 test following Benjamini and Hochberg FDR procedure was performed between  
245 bacteria in placentas and negative controls (\* indicates  $p < 0.05$ ).

Supplementary tables S1-S6

Supplementary table S1. Characteristics of the study cohort (Mean±SD or N/N (%/%%))

| Characteristics                  | NP            | PE            | P-value | PE-subgroup   |              |              |               |
|----------------------------------|---------------|---------------|---------|---------------|--------------|--------------|---------------|
|                                  |               |               |         | PETSF         | PESF         | Early onset  | Late onset    |
| N                                | 85            | 67            |         | 27            | 40           | 21           | 46            |
| Age (y)                          | 28.52±4.33    | 30.16±5.84    | P=0.056 | 29.67±4.95    | 30.5±6.41    | 31.14±6.44   | 29.72±5.56    |
| Gestational age (w)              | 38.1± 2.5     | 34.96±3.27    | p<0.001 | 37.4±1.5      | 33.3±3.1     | 30.8±1.7     | 36.9±1.7      |
| Weight (kg)                      | 69.11±8.10    | 78.07±13.18   | p<0.001 | 79.35±13.15   | 76.83±13.34  | 76.46±12.61  | 78.64±13.49   |
| BMI (kg/m²)                      | 26.98±2.94    | 30.52±4.62    | p<0.001 | 30.59±4.12    | 30.46±5.13   | 30.23±4.66   | 30.63±4.66    |
| SBP (mmHg)                       | 120.73±9.64   | 159.6±11.69   | p<0.001 | 151.89±6.27   | 164.72±11.7  | 168.29±12.22 | 155.57±9.06   |
| DBP (mmHg)                       | 71.71±6.76    | 100.1±9.51    | p<0.001 | 96.67±6.9     | 102.47±10.36 | 103.05±10.65 | 98.8±8.74     |
| Proteinuria<br>(-,+,++,+++,++++) | 62/16/5/2/0   | 1/11/13/22/20 | p<0.001 | 0/7/5/15/0    | 1/4/8/7/20   | 1/3/5/4/8    | 0/8/8/18/12   |
| Edema (-,+,++,+++)               | 84/0/1/0      | 33/17/10/7    | p<0.001 | 16/7/4/0      | 17/10/6/7    | 9/4/5/3      | 24/13/5/4     |
| Neoweight (kg)                   | 3.20±0.54     | 2.60±0.92     | p<0.001 | 3.18±0.57     | 2.11±0.88    | 1.4±0.53     | 2.94±0.7      |
| AT_III (µg/L)                    | 94.8±12.15    | 86.77±14.74   | p<0.01  | 89.15±12.46   | 84.94±16.22  | 83.53±14.93  | 88.05±14.65   |
| ALT (U/L)                        | 11.69±4.88    | 22.79±30.50   | p<0.01  | 13.41±7.52    | 29.12±37.87  | 31.86±22.48  | 18.65±32.92   |
| AST (U/L)                        | 18.12±4.46    | 28.31±31.47   | p<0.01  | 20±6.1        | 33.92±39.64  | 32.43±20.85  | 26.43±35.33   |
| Cr (µmol/L)                      | 43.33±7.53    | 55.71±13.90   | p<0.001 | 50.41±10.13   | 59.47±15.08  | 59.61±14.58  | 54.1±13.45    |
| TT (s)                           | 12.63±0.72    | 13.52±1.67    | p<0.001 | 13.04±1.11    | 13.86±1.92   | 13.73±1.54   | 13.43±1.73    |
| ALB (g/L)                        | 38.76±2.25    | 34.68±4.24    | p<0.001 | 35.81±2.57    | 33.88±4.99   | 33.05±5.55   | 35.35±3.42    |
| TP (s)                           | 65.94±4.05    | 61.05±6.26    | p<0.001 | 62.93±4.57    | 59.71±6.98   | 58.21±7      | 62.22±5.6     |
| Hemorrhage (ml)                  | 366.17±103.09 | 422.37±144.91 | p<0.05  | 463.33±185.14 | 387.81±88.58 | 425±110.15   | 421.63±154.36 |
| HDL(mmol/L)                      | 1.80±0.45     | 1.75±0.45     | p=0.461 | 1.68±0.42     | 1.8±0.47     | 1.77±0.48    | 1.74±0.44     |
| LDL(mmol/L)                      | 2.60±0.95     | 2.61±1.19     | p=0.953 | 2.43±1.18     | 2.74±1.19    | 2.73±0.89    | 2.57±1.3      |
| Triglyceride (mmol/L)            | 3.49±1.20     | 5.0±3.28      | p<0.001 | 5.01±3.07     | 4.99±3.45    | 4.11±1.88    | 5.36±3.66     |

|                         |            |            |         |            |            |            |            |
|-------------------------|------------|------------|---------|------------|------------|------------|------------|
| PLT (×10 <sup>9</sup> ) | 221.2±55.3 | 217.9±74.5 | p=0.764 | 232.3±56.7 | 207.6±84.2 | 178.3±67.0 | 234.2±71.9 |
|-------------------------|------------|------------|---------|------------|------------|------------|------------|

248 **NOTE:** Differences in characteristics between PE group and NP group were evaluated, using Student’s t-test or  $\chi^2$  test. Abbreviations: N, sample  
249 size; SD, standard deviation; NP, normotensive pregnant women; PE, preeclampsia; PETSF, preeclampsia without severe features; PESF,  
250 preeclampsia with severe features; BMI, body mass index; SBP, systolic blood pressure; DBP, diastolic blood pressure; AT-III, antithrombin III;  
251 ALT, alanine aminotransferase; AST, Aspartate aminotransferase; Cr, creatinine; TT, thrombin time; ALB, albumin; TP, total protein; HDL, high  
252 density lipoprotein; LDL, low density lipoprotein; PLT, blood platelet.

253 **Supplementary table S2. Characteristics of the donors of placenta (Mean±SD or N/N(%/%))**

| Characteristics             | NP           | PE           | P-value |
|-----------------------------|--------------|--------------|---------|
| N                           | 22           | 24           |         |
| Age (y)                     | 29.05±4.51   | 30.75±6.22   | p=0.29  |
| Gestational age (w)         | 37.8±2.4     | 32.6±2.9     | <0.001  |
| Weight (kg)                 | 67.4±7.68    | 73.59±14.1   | p=0.12  |
| BMI (kg/m <sup>2</sup> )    | 25.58±2.69   | 29.03±5.2    | p=0.02  |
| SBP (mmHg)                  | 119.82±9.91  | 162.75±10.23 | p<0.001 |
| DBP (mmHg)                  | 70.5±6.95    | 103.88±10.66 | p<0.001 |
| Proteinuria<br>(-,+,++,+++) | 19/1/2/0/0   | 1/2/4/4/13   | p<0.001 |
| Edema (-,+,++,+++)          | 22/0/0/0     | 12/6/2/4     | p<0.001 |
| Neoweight (kg)              | 3.38±0.49    | 1.88±0.64    | p<0.001 |
| AT_III (µg/L)               | 94.23±11.61  | 83.48±15.39  | p=0.01  |
| ALT (U/L)                   | 10.73±3.94   | 22.96±19.15  | p<0.01  |
| AST (U/L)                   | 18.09±5.68   | 27.54±14.72  | p<0.01  |
| Cr (µmol/L)                 | 41.27±7.63   | 59.52±13.72  | p<0.001 |
| TT (s)                      | 12.48±0.68   | 13.72±1.93   | p<0.01  |
| ALB (g/L)                   | 38.72±1.99   | 34.43±4.45   | p<0.001 |
| TP (s)                      | 65.96±3.67   | 60.8±6.61    | p<0.01  |
| Hemorrhage (ml)             | 342.89±75.49 | 387.22±95.83 | p=0.13  |
| HDL(mmol/L)                 | 1.97±0.5     | 1.85±0.38    | p=0.37  |
| LDL(mmol/L)                 | 2.6±1.05     | 2.83±1.18    | p=0.50  |
| Triglyceride (mmol/L)       | 3.63±1.2     | 5.11±4.19    | p=0.12  |
| PLT (×10 <sup>9</sup> )     | 203.9±41.5   | 223.7±91.6   | 0.337   |

254 **NOTE:** Differences in characteristics between PE and Normotension group were  
 255 evaluated, using Student's t-test or  $\chi^2$  test. Abbreviations: N, sample size; SD, standard  
 256 deviation; NP, normotensive pregnant women; PE, preeclampsia; BMI, body mass  
 257 index; SBP, systolic blood pressure; DBP, diastolic blood pressure; AT-III, antithrombin  
 258 III; ALT, alanine aminotransferase; AST, Aspartate aminotransferase; Cr, creatinine; TT,  
 259 thrombin time; ALB, albumin; TP, total protein; HDL, high density lipoprotein; LDL,  
 260 low density lipoprotein; PLT, blood platelet.

261

| Supplementary table S3. Characteristics of the donors for fecal microbiota transplantation |               |               |               |            |            |            |
|--------------------------------------------------------------------------------------------|---------------|---------------|---------------|------------|------------|------------|
| Characteristics                                                                            | NP            |               |               | PE         |            |            |
|                                                                                            | Health.H042.B | Health.H043.B | Health.H082.B | PIH.P132.B | PIH.P136.B | PIH.P149.B |
| Age (y)                                                                                    | 28            | 25            | 25            | 27         | 29         | 26         |
| Gestational age (w)                                                                        | 38.3          | 38.4          | 39            | 39.4       | 40.2       | 32         |
| BMI (kg/m <sup>2</sup> )                                                                   | 27.82         | 25.81         | 34.13         | 36.11      | 25.53      | 34.41      |
| SBP (mmHg)                                                                                 | 106           | 102           | 111           | 158        | 152        | 183        |
| DBP (mmHg)                                                                                 | 60            | 63            | 69            | 101        | 104        | 124        |
| Proteinuria (-,+,++,+++)                                                                   | +             | 0             | 0             | +++        | ++         | ++         |
| Edema (-,+,++,+++)                                                                         | 0             | 0             | 0             | ++         | 0          | ++         |
| Neoweight (kg)                                                                             | 3.1           | 3.4           | 3.95          | 3.6        | 3.1        | 1.78       |
| AT_III (µg/L)                                                                              | 86            | 99            | 89            | 90         | 88         | 70         |
| ALT (U/L)                                                                                  | 8             | 10            | 8             | 17         | 11         | 43         |
| AST (U/L)                                                                                  | 10            | 15            | 13            | 23         | 22         | 3          |
| Cr (µmol/L)                                                                                | 43            | 44            | 52            | 67         | 49         | 87         |
| TT (s)                                                                                     | 13.6          | 12.5          | 11.9          | 13.1       | 12.7       | 13.4       |
| ALB (g/L)                                                                                  | 36.9          | 36.9          | 39.6          | 33.7       | 39         | 26.2       |
| TP (s)                                                                                     | 64.9          | 60.1          | 68.5          | 56.5       | 67.3       | 53.9       |
| Hemorrhage (ml)                                                                            | 315           | 315           | 315           | 515        | 1315       | 315        |
| HDL(mmol/L)                                                                                | 1.53          | 1.65          | 1.88          | 1.56       | 1.51       | 3.14       |
| LDL(mmol/L)                                                                                | 1.89          | 2.46          | 2.72          | 1.38       | 4.96       | 3.19       |
| PLT (×10 <sup>9</sup> )                                                                    | 253           | 192           | 207           | 185        | 213        | 202        |

262 **NOTE:** Abbreviations: NP, normotensive pregnant women; PE, preeclampsia; BMI, body mass index; SBP, systolic blood pressure; DBP,  
263 diastolic blood pressure; AT-III, antithrombin III; ALT, alanine aminotransferase; AST, Aspartate aminotransferase; Cr, creatinine; TT, thrombin  
264 time; ALB, albumin; TP, total protein; HDL, high density lipoprotein; LDL, low density lipoprotein; PLT, blood platelet.

265     **Supplementary table S4. Group and cage number of the mice involved in the study**

| FMT treatment                                      | group name | NO. of cage | NO. of mice      |
|----------------------------------------------------|------------|-------------|------------------|
| PBS                                                | control    | Cage 1      | C49<br>C56       |
|                                                    |            | Cage 2      | C53<br>C15       |
|                                                    |            | Cage 3      | C51<br>C38       |
|                                                    |            | Cage 5      | C13<br>C19       |
|                                                    |            | Cage 6      | H9               |
| fecal supensant<br>mixture from three<br>NP donors | NP-FMT     | Cage 7      | H7<br>H4         |
|                                                    |            | Cage 8      | H10<br>H34<br>H8 |
|                                                    |            | Cage 9      | H26<br>H54       |
|                                                    |            | Cage 10     | H17<br>H23       |
|                                                    |            | Cage 11     | P22<br>P37       |
| fecal supensant<br>mixture from three<br>PE donors | PE-FMT     | Cage 12     | P55<br>P41       |
|                                                    |            | Cage 13     | P30<br>P52       |
|                                                    |            | Cage 15     | P32<br>P63       |

266     **NOTE:** Abbreviations: FMT, fecal microbiota transplantation; NP, normotensive  
267     pregnant women; PE, preeclampsia; PBS, phosphate buffer saline.

268

269

**Supplementary table S5. Primers used in quantitative-PCR analysis**

| Gene                 | Primer  | Sequence(5' to 3')       |
|----------------------|---------|--------------------------|
| <i>16sRNA</i>        | Forward | GTGSTGCAYGGYTGTCGTCA     |
|                      | Reverse | ACGTCRTCCMCACCTTCCTC     |
| <i>Fusobacterium</i> | Forward | GGATTTATTGGGCGTAAAGC     |
|                      | Reverse | GGCATTCTACAAATATCTACGAA  |
| <i>18sRNA</i>        | Forward | AGTCCCTGCCCTTTGTACACA    |
|                      | Reverse | CGATCCGAGGGCCTCACTA      |
| <i>Tjp1</i>          | Forward | ACCCGAAACTGATGCTGTGGATAG |
|                      | Reverse | AAATGGCCGGGCAGAACTTGTGTA |
| <i>Tjp2</i>          | Forward | TGCAATTCCAAATCCAAACC     |
|                      | Reverse | GTGATTTTCTTCAACCCGGA     |
| <i>occludin</i>      | Forward | CCCAGGCTTCTGGATCTATGT    |
|                      | Reverse | TCCATCTTTCTTCGGGTTTTCA   |
| <i>claudin4</i>      | Forward | TGATTATGGTGCCCGTGTCC     |
|                      | Reverse | CGAGTAGGGCTTGTCGTTGC     |
| <i>Il6</i>           | Forward | TGATGCACTTGCAGAAAACA     |
|                      | Reverse | ACCAGAGGAAATTTCAATAGGC   |
| <i>Il1β</i>          | Forward | TGTGAAATGCCACCTTTTGA     |
|                      | Reverse | GGTCAAAGGTTTGGAAGCAG     |
| <i>Ccl3</i>          | Forward | ACCATGACACTCTGCAACCA     |
|                      | Reverse | GTGGAATCTTCCGGCTGTAG     |
| <i>Ccl4</i>          | Forward | CATGAAGCTCTGCGTGTCTG     |
|                      | Reverse | GAAACAGCAGGAAGTGGGAG     |
| <i>Cxcl1</i>         | Forward | CCCACTCAAGAATGGTCGC      |
|                      | Reverse | TCTCCGTTACTTGGGGACAC     |
| <i>Vegf</i>          | Forward | TTACTGCTGTACCTCCACC      |
|                      | Reverse | ACAGGACGGCTTGAAGATG      |

270

271

272

**Supplementary table S6. Probes used in *In Situ* Hybridization**

| Probe name           | Sequence(5' to 3')    |
|----------------------|-----------------------|
| EUB338I              | GCTGCCTCCCGTAGGAGT    |
| EUB338II             | GCAGCCACCCGTAGGTGT    |
| EUB338III            | GCTGCCACCCGTAGGTGT    |
| NOEUB                | ACTCCTACGGGAGGCAGC    |
| <i>Fusobacterium</i> | CTAATGGGACGCAAAGCTCTC |

273



274 **Reference**

- 275 1. He Y, Wu W, Zheng HM, *et al.* Regional variation limits applications of healthy gut  
276 microbiome reference ranges and disease models. *Nat Med* 2018;24:1532-1535.
- 277 2. Hu J, Luo H, Wang J, *et al.* Enteric dysbiosis-linked gut barrier disruption triggers  
278 early renal injury induced by chronic high salt feeding in mice. *Exp Mol Med*  
279 2017;49:e370.

280
